# Supplementary material
Source: publisher figshare collection journal article supplement (https://springernature.figshare.com/ndownloader/files/8662651)
Supplement: Supplementary file 1 [file 8662651]

**Table S1**: The abundance of individual winter annual and herbaceous perennial species in the research enclosures depending on treatment. Values for season treatments reflect species abundances for spring-dominant or winter-dominant cool-season rain across both the LOW and HIGH treatments. Values for quantity treatments reflect species abundances for LOW and HIGH treatments across both seasonal treatments.

|  |  | | | | |  | Rainfall Treatment | | | | |
| --- | --- | --- | --- | --- | --- | --- | --- | --- | --- | --- | --- |
|  |  | | | | |  | Season | |  | Quantity | |
|  | | Common Name | | | | Latin Name | Spring | Winter |  | LOW | HIGH |
| **Native** | Desert Marigold | | | | *Baileya multiradiata* | | - | 9 |  | 1 | 8 |
|  | Booths' Evening Primrose | | | | *Eremothera boothii* | | - | 10 |  | 3 | 7 |
|  | Brittle Spineflower | | | | *Chorizanthe brevicornu* | | - | 5 |  | 4 | 1 |
|  | Parry's Spineflower | | | | *Chorizanthe parryi* | | 1 | - |  | 1 | - |
|  | Devil's Spineflower | | | | *Chorizanthe rigida* | | - | 5 |  | - | 5 |
|  | Winged Nut Forget Me Not | | | | *Cryptantha pterocarya* | | 2 | 19 |  | 8 | 13 |
|  | Pepperweed | | | | *Lapidium* spp. | | 2 | 9 |  | 5 | 6 |
|  | Parry's Linanthus | | | | *Linanthus parryae* | | - | 3 |  | 2 | 1 |
|  | Desert Dandelion | | | | *Malacothrix glabrata* | | - | 5 |  | - | 5 |
|  | Whitestem Blazing Star | | | | *Mentzelia albicaulis* | | - | 1 |  | - | 1 |
|  | Blond Psyllium | | | | *Plantago ovata* | | - | 10 |  | 2 | 8 |
|  | Combseed | | | | *Pectocarya* spp*.* | | - | 10 |  | 2 | 8 |
|  | Desert Globemallow | | | | *Sphaeralcea ambigua* | | - | 2 |  | - | 2 |
|  | | | | |  | |  |  |  |  |  |
| **Invasive** | Redstem Filaree | | | | *Erodium cicutarium* | | 2 | 9 |  | 3 | 8 |
|  | Mediterranean Grass | | | | *Schismus barbatus* | | 11 | 32 |  | 19 | 24 |
| **TOTAL - SPECIES** | | | |  | |  | **5** | **14** |  | **11** | **14** |
| **TOTAL - ABUNDANCE** | | |  | | |  | **18** | **129** |  | **50** | **97** |
